# Supplementary material for: Accelerated tumor growth in mice deficient in DNAM-1 receptor
Source: PubMed Central journal article supplement — J Exp Med. 2008 Dec 22;205(13):2959–64. doi: 10.1084/jem.20081611 (PMC2605241; doi:10.1084/jem.20081611), 2008-12-22
Supplement: jem.20081611_1.pdf [file jem.20081611_1.pdf]

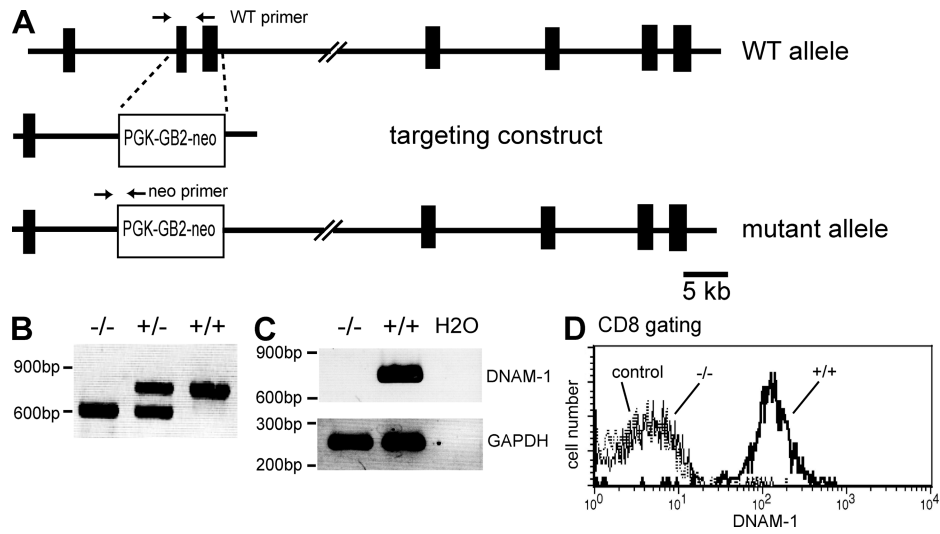

**Figure S1. Generation of DNAM-1-deficient mice.** (A) The DNAM-1 targeting vector is shown. (B) The genomic DNA from the tails of *Cd226*<sup>+/+</sup>, *Cd226*<sup>+/-</sup>, or *Cd226*<sup>-/-</sup> mice were analyzed for WT and mutant alleles by PCR. (C) Spleen cells from *Cd226*<sup>+/+</sup> or *Cd226*<sup>-/-</sup> mice were subjected to RT-PCR for *DNAM-1* and *GAPDH*. (D) Spleen cells from *Cd226*<sup>+/+</sup> or *Cd226*<sup>-/-</sup> mice were stained with FITC-conjugated anti-CD8 and biotin-conjugated anti-DNAM-1 (TX42), followed by PE-conjugated streptavidin, and analyzed by flow cytometry.

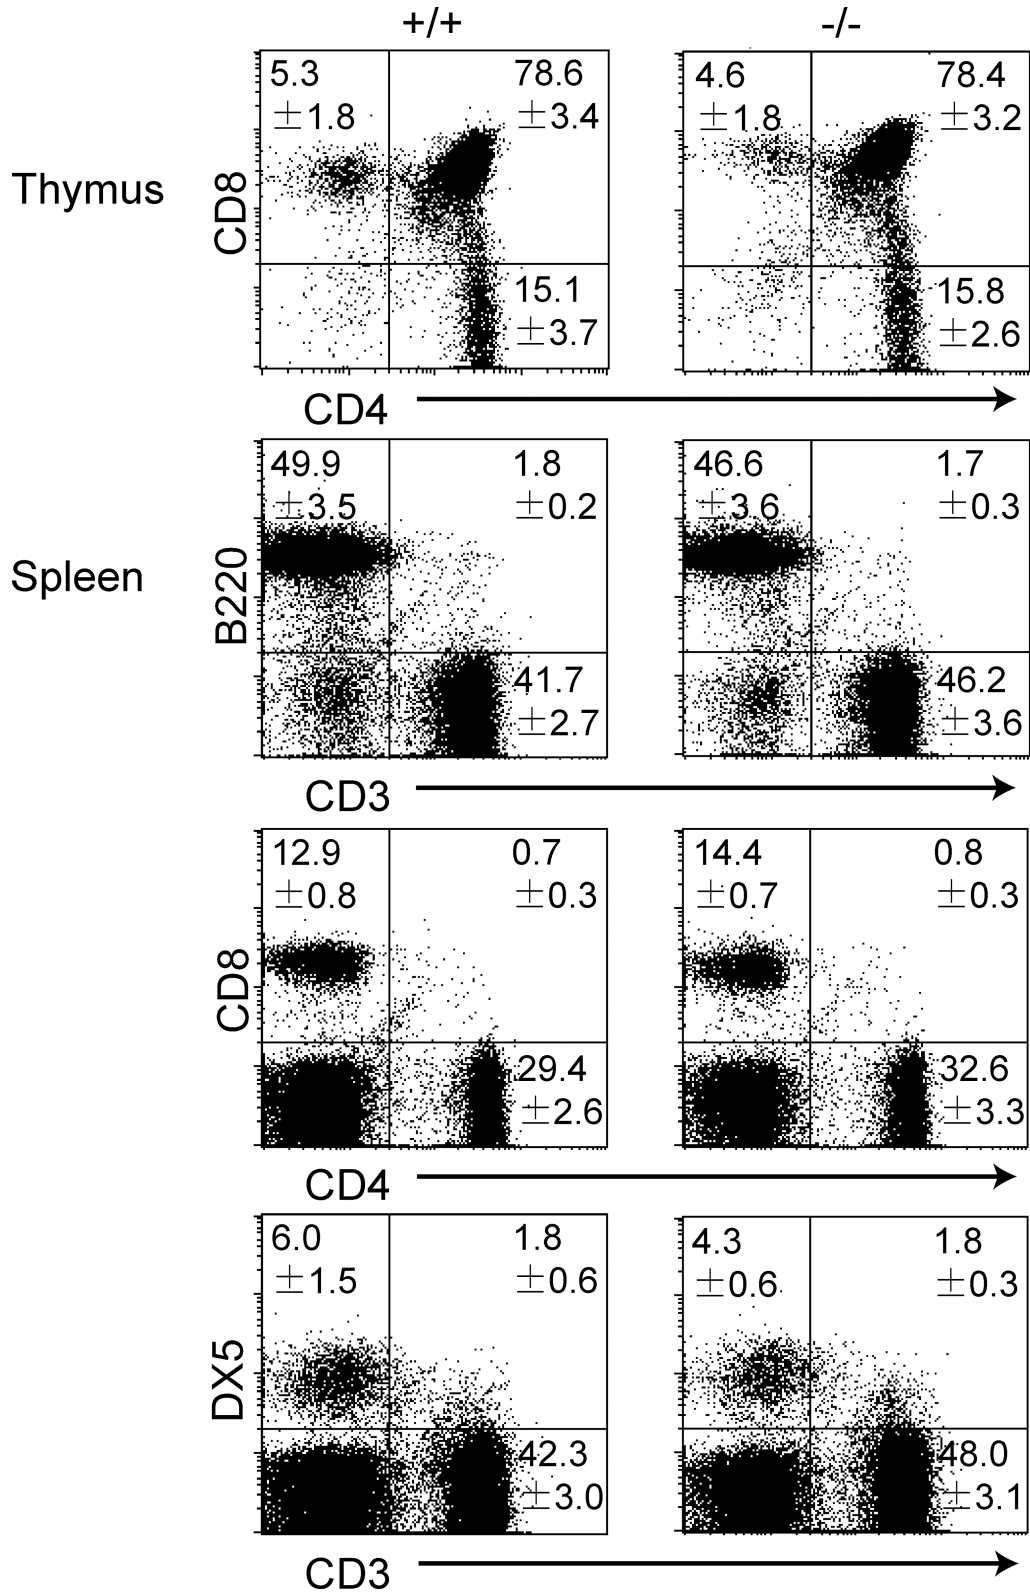

Figure S2. Lymphocytes population in DNAM-1-deficient mice. The thymus and spleen cells derived from WT ( $n = 5$ ) and DNAM-1-deficient ( $n = 5$ ) mice were stained with FITC- or PE-labeled mAbs indicated and analyzed by flow cytometry.

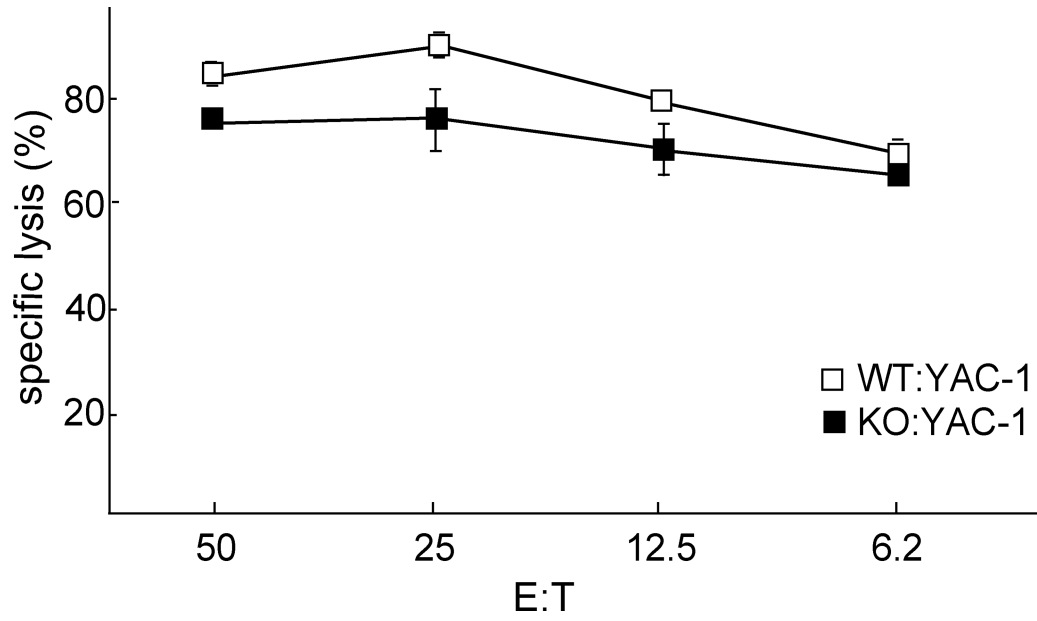

Figure S3. Cytotoxicities of Yac-1 by WT and DNAM-1-deficient NK cells. NK cells derived from WT and DNAM-1-deficient mice were cocultured with <sup>51</sup>Cr-labeled Yac-1 cells for 3 h. Culture supernatants were harvested and <sup>51</sup>Cr releases were counted. Error bars show SD.
